# Supplementary material for: Human Hematopoietic Stem Cell Engrafted IL-15 Transgenic NSG Mice Support Robust NK Cell Responses and Sustained HIV-1 Infection
Source: MDPI journal article supplement (doi:10.3390/v15020365), 2023-01-27
Supplement: s1 [file s1]

**Supplemental Table S1: Flow Cytometry Antibodies**

| Target       | Fluorophore      | Clone    | Catalog Number | Company    |
|--------------|------------------|----------|----------------|------------|
| CD45         | BV605            | HI30     | 304042         | Biolegend  |
| CD56         | BV570            | HCD56    | 318330         | Biolegend  |
| CD16         | PE-Cy5           | 3G8      | 302010         | Biolegend  |
| CD3          | APC/Fire 750     | UCHT1    | 300470         | Biolegend  |
| CD4          | BV650            | OKT4     | 317436         | Biolegend  |
| CD8a         | BV785            | RPA-T8   | 301046         | Biolegend  |
| CD19         | BV750            | HIB19    | 302262         | Biolegend  |
| CD11b        | PE/Dazzle 594    | ICRF44   | 301348         | Biolegend  |
| CD11c        | PE/CY7           | 3.9      | 46-0116-42     | Thermo     |
| CD14         | BV510            | MΦP9     | 563079         | BD         |
| CD66b        | PE               | G10F5    | 305106         | BD         |
| mCD45*       | AF700            | 30-F11   | 103128         | Biolegend  |
| CD34         | BV480            | 8G12     | 746688         | BD         |
| FoxP3        | AF532            | 2H7      | 58-0209-41     | Invitrogen |
| Tbet         | BV711            | 4B10     | 644820         | Biolegend  |
| EOMES        | PerCP-eFluor 710 | WD1928   | 46-4877-42     | Invitrogen |
| GATA3        | BV421            | 16E10A23 | 16E10A23       | Biolegend  |
| RORYT        | AF647            | Q21-559  | 563620         | BD         |
| TNF-α        | BV750            | MAb11    | 566359         | BD         |
| IFN-γ        | AF700            | 4S.B3    | 502520         | Biolegend  |
| Perforin     | PE               | B-D48    | 353304         | Biolegend  |
| Granzyme B   | PacBlue          | GB11     | 515408         | Biolegend  |
| CXCR6        | PE/Dazzle 594    | K041E5   | 356016         | Biolegend  |
| CD62L        | PerCP-Cy5.5      | DREG-56  | 304824         | Biolegend  |
| CD57         | BB515            | NK-1     | 565285         | BD         |
| CD69         | BV510            | FN50     | 310936         | Biolegend  |
| CD49e        | BV650            | IIA1     | 740586         | BD         |
| CD107a/Lamp1 | BV786            | H4A3     | 563869         | BD         |
| NKp46        | BV650            | 9E2      | 331927         | Biolegend  |
| NKp30        | BUV805           | P30-15   | 749127         | BD         |
| KIR3DL1      | PerCP/Cy5.5      | DX9      | 312718         | Biolegend  |
| KIR2DL1      | AF488            | 143211   | FAB1844G       | R&D        |
| KIR2DL3      | AF700            | 180701   | FAB2014N       | R&D        |
| KIR2DS4      | AF647            | 179315   | 564375         | BD         |

\* Murine specific antibodies, all others are specific to human antigen

**Supplemental Figure S1**

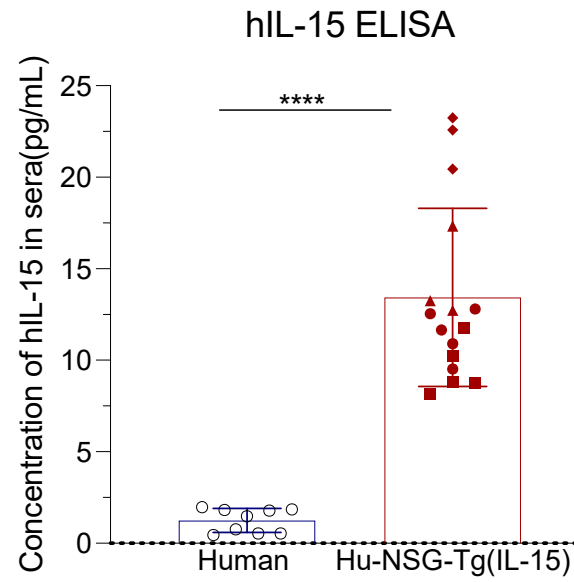

**Supplemental Figure S1:** Concentration of human IL-15 in sera of humanized NSG-Tg(IL-15) (n=16, 4 unrelated donors) and human donors (n=9). Statistical significance was calculated using an unpaired t-test.

## Supplemental Figure S2

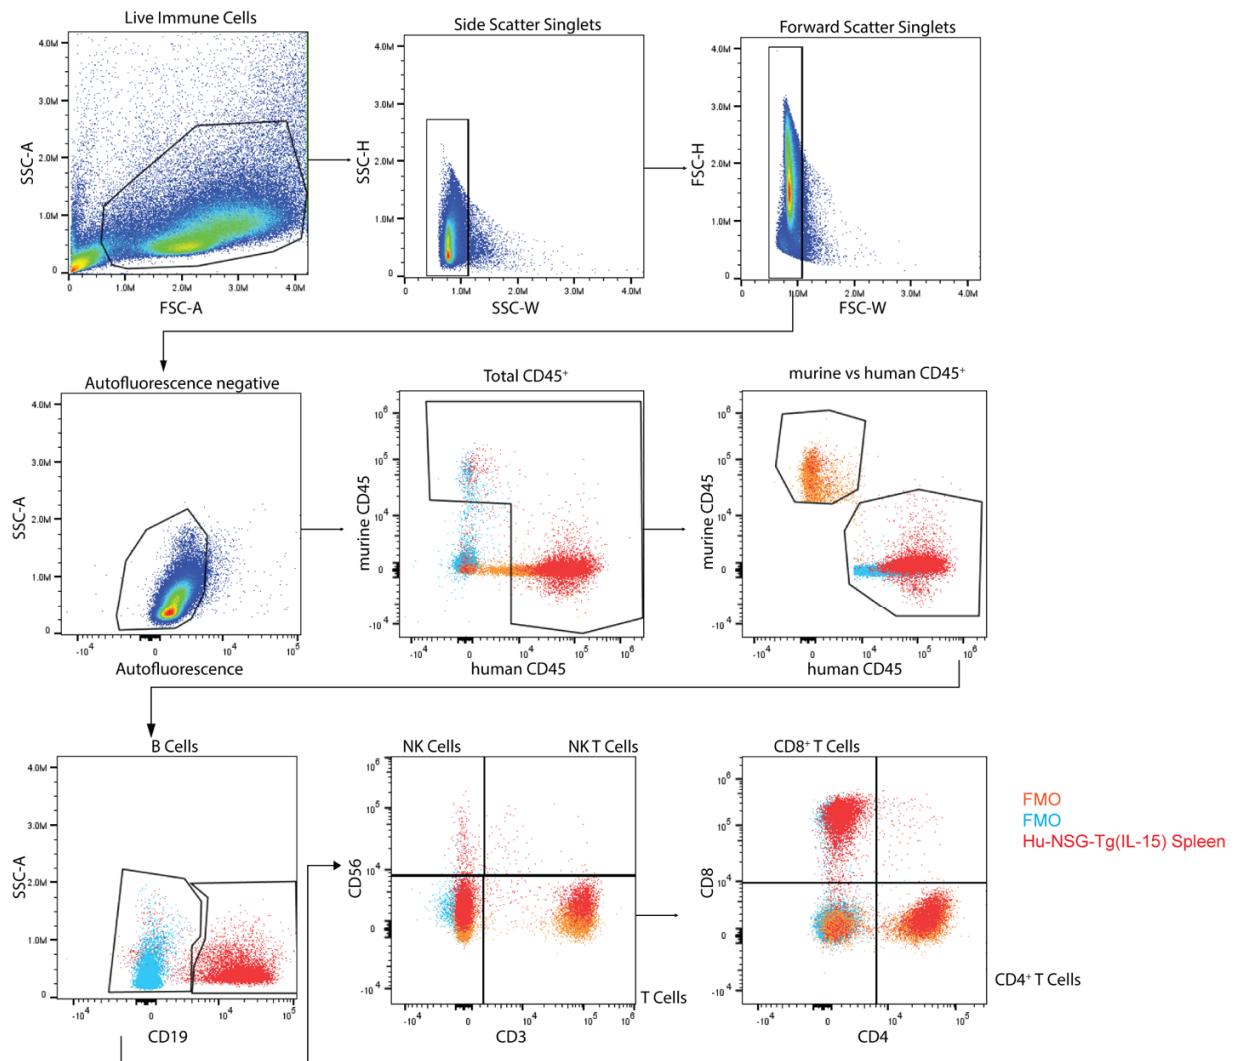

**Supplemental Figure S2. Gating Strategy:** Fluorescence minus one (FMO) control staining for each fluorophore in each respective panel is displayed in orange and teal. Representative Hu-NSG-Tg(IL-15) spleen staining in red. Markers of different cell types as detailed in the figure.

## Supplemental Figure S3

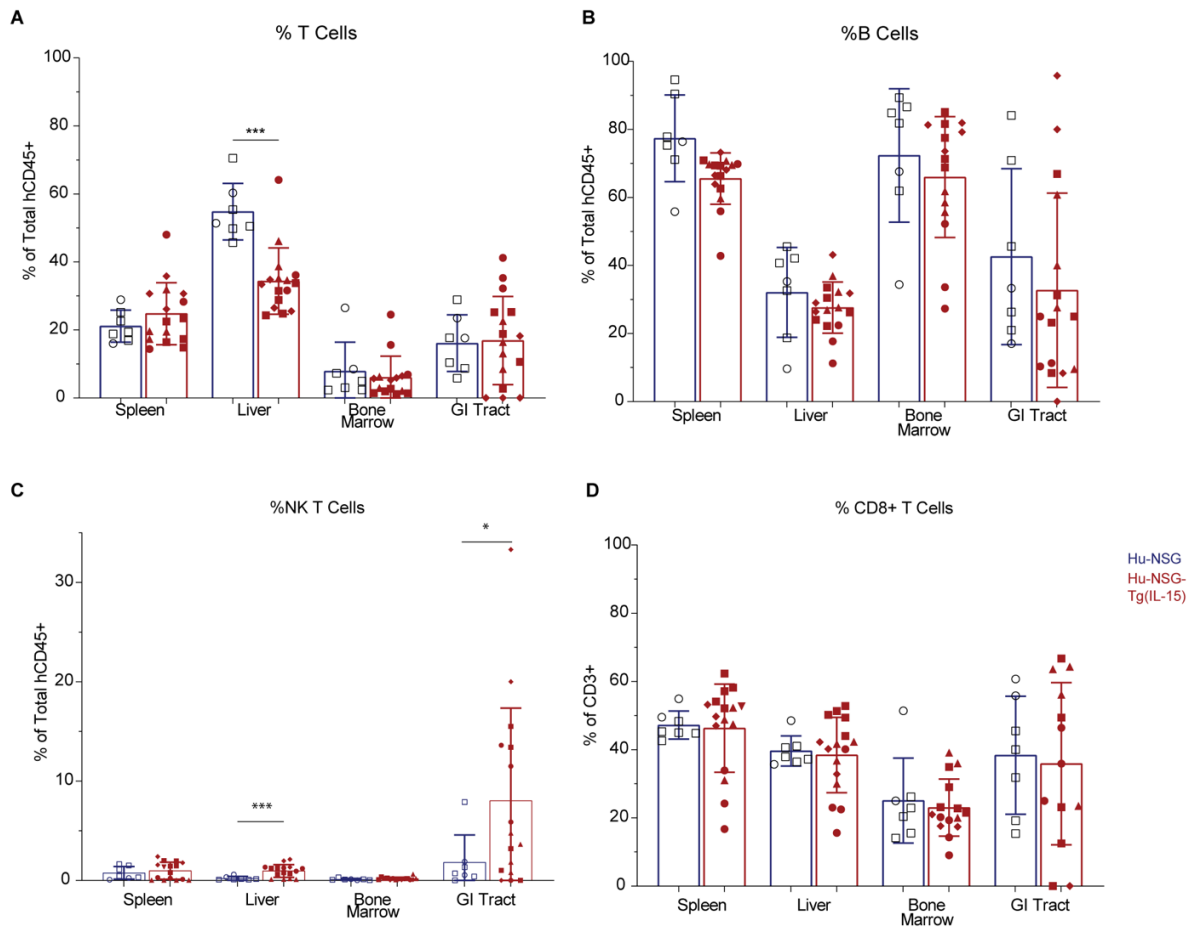

**Supplemental Figure S3: Hu-NSG-Tg(IL-15) and Hu-NSG mice engraftment of T cells, B cells and NK T cells across multiple organs.** A) Percentages of human T cells (CD3<sup>+</sup>CD56<sup>-</sup>CD19<sup>-</sup>) in PBMC, spleen, liver, bone marrow, and gastrointestinal tract. Hu-NSG (n=7, 2 unrelated donors) and Hu-NSG-Tg (IL-15) (n=16, 4 unrelated donors). B) Percentage of human B cells (CD3<sup>+</sup>CD56<sup>-</sup>CD19<sup>+</sup>) in PBMC, spleen, liver, bone marrow, and gastrointestinal tract. Hu-NSG (n=7, 2 unrelated donors) and Hu-NSG-Tg(IL-15) (n=16, 4 unrelated donors). C) Percentage of human NK T cells (CD3<sup>+</sup>CD56<sup>+</sup>CD19<sup>-</sup>) in PBMC, spleen, liver, bone marrow, and gastrointestinal tract. Hu-NSG (n=7, 2 unrelated donors) and Hu-NSG-Tg(IL-15) (n=16, 4 unrelated donors). D) Percentage of human CD8<sup>+</sup> T cells (CD3<sup>+</sup>CD8<sup>+</sup>CD4<sup>-</sup>CD56<sup>-</sup>CD19<sup>-</sup>) in PBMC, spleen, liver, bone marrow, and gastrointestinal tract. Hu-NSG (n=7, 2 unrelated donors) and Hu-NSG-Tg (IL-15) (n=16, 4 unrelated donors). Statistical significance was calculated using unpaired t-test for 2 groups \*P < 0.05, and \*\*\*P < 0.005.

## Supplemental Figure S4

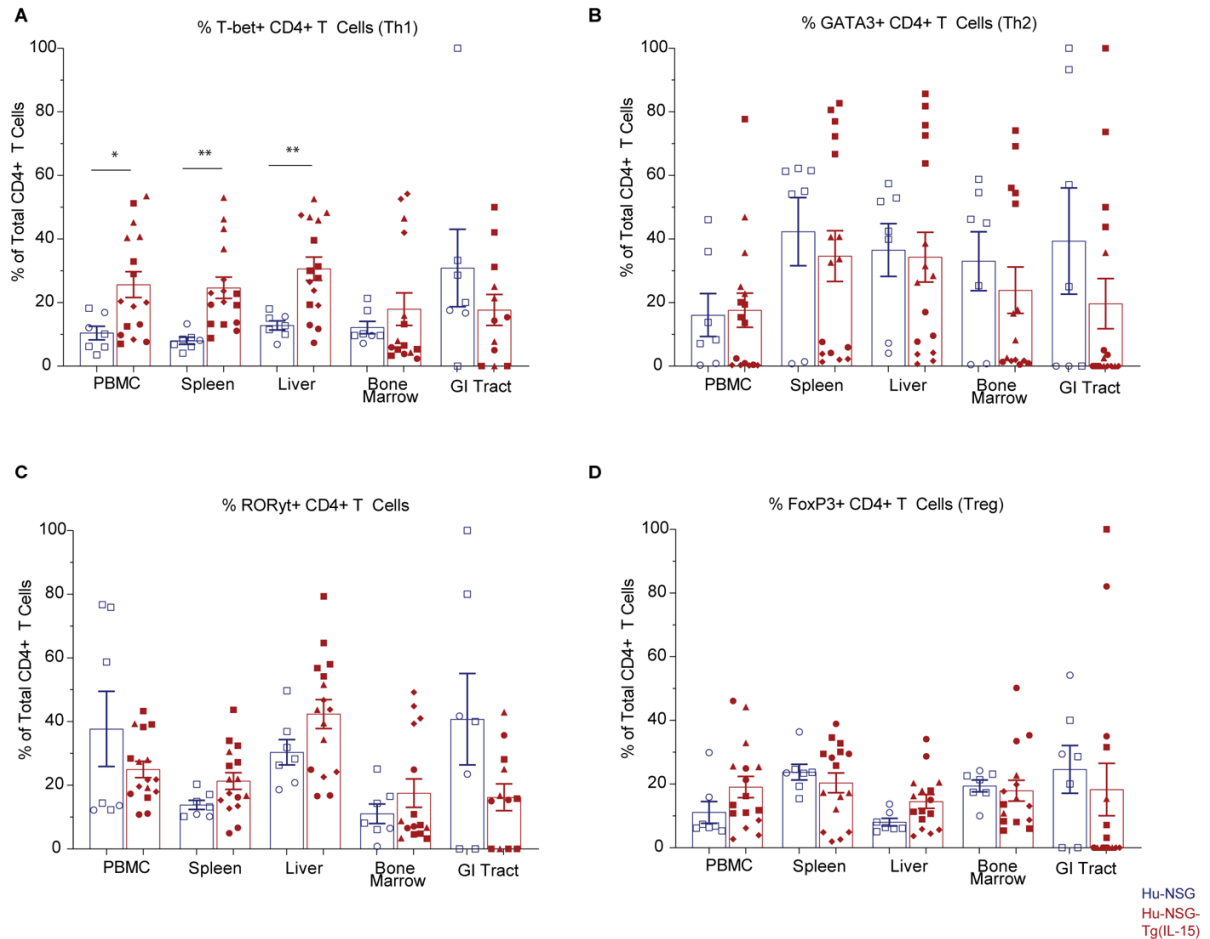

**Supplemental Figure S4: Hu-NSG-Tg(IL-15) and Hu-NSG mice engraftment of CD4<sup>+</sup> T cell subsets across multiple organs.** A) Percentage of T-bet<sup>+</sup> T cells (CD3<sup>+</sup>CD4<sup>+</sup>Tbet<sup>+</sup>CD8<sup>-</sup>CD56<sup>-</sup>CD19<sup>-</sup>) in PBMC, spleen, liver, bone marrow, and gastrointestinal tract. Hu-NSG (n=7, 2 unrelated donors) and Hu-NSG-Tg(IL-15) (n=16, 4 unrelated donors). B) Percentage of GATA3<sup>+</sup> T cells (CD3<sup>+</sup>CD4<sup>+</sup>GATA3<sup>+</sup>CD8<sup>-</sup>CD56<sup>-</sup>CD19<sup>-</sup>) in PBMC, spleen, liver, bone marrow, and gastrointestinal tract. Hu-NSG (n=7, 2 unrelated donors) and Hu-NSG (IL-15Tg) (n=16, 4 unrelated donors). C) Percentage of RORγT<sup>+</sup> T cells (CD3<sup>+</sup>CD4<sup>+</sup>RORγT<sup>+</sup>CD8<sup>-</sup>CD56<sup>-</sup>CD19<sup>-</sup>) in PBMC, spleen, liver, bone marrow, and gastrointestinal tract. Hu-NSG (n=7, 2 unrelated donors) and Hu-NSG-Tg(IL-15) (n=16, 4 unrelated donors). D) Percentage of FoxP3<sup>+</sup> T cells (CD3<sup>+</sup>CD4<sup>+</sup>FoxP3<sup>+</sup>CD8<sup>-</sup>CD56<sup>-</sup>CD19<sup>-</sup>) in PBMC, spleen, liver, bone marrow, and gastrointestinal tract. Hu-NSG (n=7, 2 unrelated donors) and Hu-NSG-Tg-(IL-15) (n=16, 4 unrelated donors). Statistical significance was calculated using unpaired t-test for 2 groups \*P < 0.05, \*\*P<0.01, and \*\*\*P < 0.005.

## Supplemental Figure S5

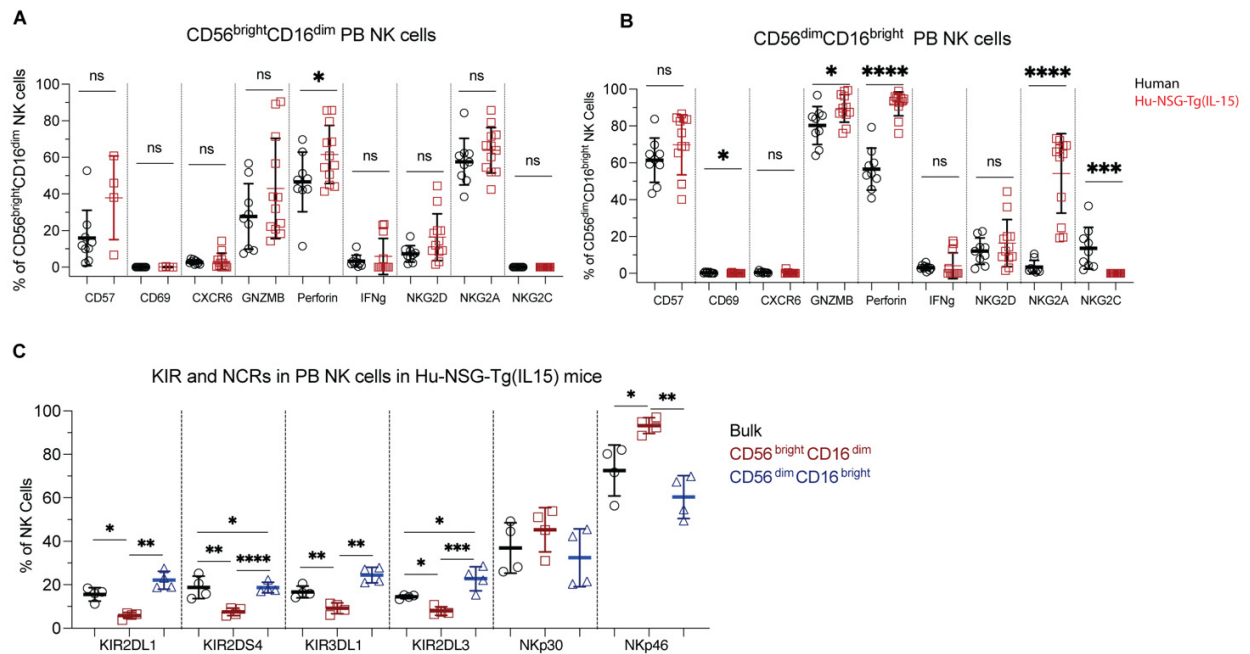

**Supplemental Figure S5: Phenotypic characterization of CD56<sup>bright</sup>CD16<sup>dim</sup> and CD56<sup>dim</sup>CD16<sup>bright</sup> peripheral blood NK cells subsets in Hu-NSG-Tg(IL-15).** A) Percentage of CD57, CD69, CXCR6, Granzyme B (GNZMB), Perforin, IFN $\gamma$ , NKG2D, NKG2A or NKG2C positive cells in the CD56<sup>bright</sup>CD16<sup>dim</sup> subset of peripheral blood NK cells in human donors (n=9) and Hu-NSG-Tg(IL-15) mice (1-3 unrelated donors, n=4-10 mice per donor, 3-6 months post CD34<sup>+</sup> HSC transplant). B) Percentage of CD57, CD69, CXCR6, Granzyme B (GNZMB), Perforin, IFN $\gamma$ , NKG2D, NKG2A or NKG2C positive cells in the CD56<sup>dim</sup>CD16<sup>bright</sup> subset of peripheral blood NK cells in human donors (n=9) and Hu-NSG-Tg(IL-15) mice (1-3 unrelated donors, n=4-10 mice per donor, 3-6 months post CD34<sup>+</sup> HSC transplant). C) Percentage of KIR and NCR receptors on total PB NK cells (Bulk), CD56<sup>bright</sup>CD16<sup>dim</sup> PB NK cells and CD56<sup>dim</sup>CD16<sup>bright</sup> PB NK cells from Hu-NSG-Tg(IL-15) mice (1 donor, n=4 per group) 4 months post-transplant with CD34<sup>+</sup> HSCs. Statistical significance was calculated using unpaired t-test for 2 groups and one-way ordinary ANOVA with multiple comparisons for 3 groups. \*P < 0.05, \*P < 0.01, \*\*\*P < 0.005 and \*\*\*\*P < 0.001.

## Supplemental Figure S6

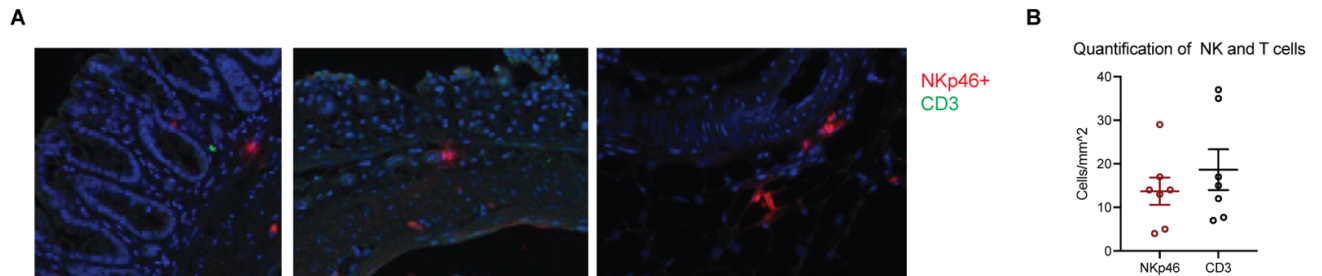

**Supplemental Figure S6: NK Cell and T cell Immunohistochemistry of the GI tract of healthy Hu-NSG-Tg(IL-15) mice.** A) Immunohistochemistry of FFPE NK cells (NKp46<sup>+</sup>) shown in red and T cells (CD3<sup>+</sup>) shown in green from GI tract of Hu-NSG(IL-15Tg) mice (n=7) 6 months post CD34<sup>+</sup> HSC transplant. B) Quantification of IHC stained NKp46<sup>+</sup> cells and CD3<sup>+</sup> cells of Hu-NSG(IL-15Tg) mice 6 months post CD34<sup>+</sup> HSC transplant.

## Supplemental Figure S7

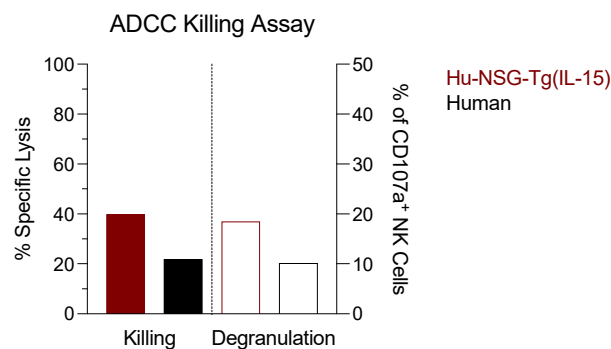

**Supplemental Figure S7: Antibody-dependent cellular cytotoxicity killing assay.** Calcein release assay with splenocytes from Hu-NSG-Tg(IL-15) or human PBMCs co-cultured with Raji cells at 10:1 effector to target ratio for 6 hours in the presence of Anti-CD20 antibody (left axis). Cells from 2 mice were pooled prior to incubation with target cells. Background cell death during co-culture in the absence of anti-CD20 was deducted. Hu-NSG-Tg(IL-15) mouse splenocytes or human PBMCs were stained with anti-CD107a antibody after 6 hours co-cultured with Raji cells (right axis). CD107a<sup>+</sup> expressing NK cells (hCD45<sup>+</sup>mCD45<sup>-</sup>CD3<sup>+</sup>CD56<sup>+</sup>CD107a<sup>+</sup>) as a percentage of total NK cells is presented.



## Supplemental Figure S8

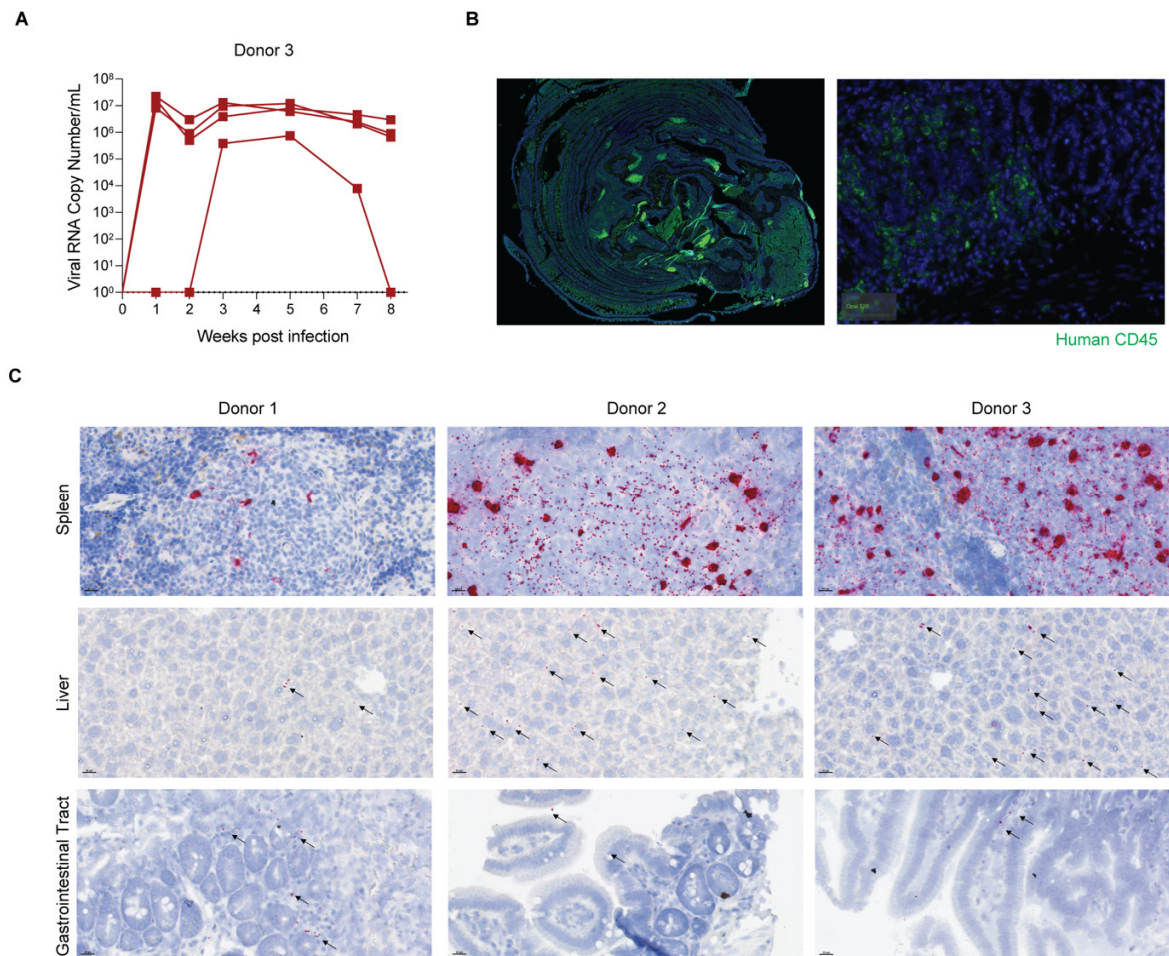

**Supplemental Figure S8 : Hu-NSG-Tg(IL-15) mice display human immune cells in the GI tract and HIV-1 infection in the blood, spleen, liver and GI tract across multiple donor cohorts.** A) RT-qPCR of viral RNA extracted from sera of HIV-1 infected ( $Q23.17 \times 10^5$  IU) Hu-NSG-Tg(IL-15) mice from donor 3 (n=4 mice) 6 months post CD34<sup>+</sup> stem cell transplant. B) IHC of human immune cells in GI tract harvested from Hu-NSG-Tg(IL-15) mouse 8 weeks post-infection. C) Representative images from RNAscope performed on FFPE blocks of spleen, liver, and GI tract harvested 8 weeks post infection with HIV-1 from Hu-NSG-Tg(IL-15) mice for 3 donors. Red punctate dots indicate positive binding of HIV-1 probe to HIV-1 RNA. Arrows indicate positive RNAscope staining.
